# Supplementary material for: Molecular Epidemiology of Human Enterovirus 71 Strains and Recent Outbreaks in the Asia-Pacific Region: Comparative Analysis of the VP1 and VP4 Genes
Source: PubMed Central journal article supplement (PMC2957976; doi:10.3201/eid0904.020395), 2003-04
Supplement: 02-0395_appT1-s1.pdf [file 02-0395_appT1-s1.pdf]

**Appendix Table 1.** Human enterovirus 71 (HEV71) strains sequenced for this study

| Identity (strain/origin <sup>a</sup> /yr) | Accession no. <sup>b</sup> | Genogroup based on |           | Clinical syndrome <sup>c</sup> |
|-------------------------------------------|----------------------------|--------------------|-----------|--------------------------------|
|                                           |                            | VP1                | VP4       |                                |
| 2228-NY72/USA/72                          | AY123949                   | B1                 | B outlier | NA                             |
| 2229-NY76/USA/76                          | AY123950                   | B1                 | B1        | NA                             |
| 2230-NY76/USA/76                          | AY123951                   | B1                 | B1        | NA                             |
| 2231-NY77/USA/77                          | AY123952                   | B1                 | B1        | NA                             |
| 2235-NY77/USA/77                          | AY123953                   | B1                 | B1        | NA                             |
| 10181-NM78/USA/78                         | AY123944                   | B1                 | B1        | NA                             |
| 1011-ND79/USA/79                          | AY123943                   | B1                 | B1        | NA                             |
| 6910-OK87/USA/87                          | AY123954                   | B1                 | B outlier | Rash                           |
| 1413-CA87/USA/87                          | AY123945                   | B2                 | B2        | Paralysis                      |
| 7633-PA87/USA/87                          | AY123955                   | B2                 | B2        | Gastroenteritis                |
| 7673-CT87/USA/87                          | AY123956                   | B2                 | B2        | NA                             |
| 8102-WA87/USA/87                          | AY123957                   | B2                 | B2        | Meningitis                     |
| MY104-9/SAR/97                            | AY125997                   | B3                 | B3        | Acute cardiogenic shock, fatal |
| MY821-3/SAR/97                            | AY125995                   | B3                 | B3        | Meningitis                     |
| MY860-3/SAR/97                            | AY125996                   | B3                 | B3        | HFMD                           |
| 3526/SIN/98                               | AY125984                   | B3                 | B3        | Encephalitis                   |
| 3799/SIN/98                               | AY125985                   | B3                 | B3        | HFMD                           |
| 4915/SIN/99                               | AY125987                   | B3                 | B3        | Meningitis                     |
| 4F/AUS/4/99                               | AY126008                   | B3                 | B3        | Guillain-Barré syndrome        |
| 10M/AUS/6/99                              | AY126007                   | B3                 | B3        | HFMD                           |
| SB1647/SAR/00                             | AY126004                   | B4                 | B4        | Meningitis                     |
| SB2864/SAR/00                             | AY126006                   | B4                 | B4        | Poliomyelitis-like paralysis   |
| CN0942/SAR/00                             | AY126001                   | B4                 | B4        | HFMD                           |
| CN9502/SAR/00                             | AY126002                   | B4                 | B4        | HFMD                           |
| S21082/SAR/00                             | AY126005                   | B4                 | B4        | HFMD                           |
| 5511/SIN/00                               | AY125988                   | B4                 | B4        | HFMD                           |
| 5536/SIN/00                               | AY125991                   | B4                 | B4        | HFMD                           |
| 5769/SIN/00                               | AY125992                   | B4                 | B4        | Encephalitis                   |
| 2027/SIN/01                               | AY125993                   | B4                 | B4        | Encephalitis, fatal            |
| 2267/SIN/01                               | AY125994                   | B4                 | B4        | Febrile illness                |
| 0915-MA87/USA/87                          | AY123942                   | C1                 | C1        | Meningitis                     |
| 1873-CT94/USA/94                          | AY123946                   | C1                 | C1        | Fatality                       |
| 1919-NM94/USA/94                          | AY123947                   | C1                 | C1        | Rash                           |
| 2037-MD95/USA/95                          | AY123948                   | C1                 | C1        | NA                             |
| 4575/SIN/98                               | AY125986                   | C1                 | C1        | HFMD                           |
| S10822/SAR/98                             | AY125998                   | C1                 | C1        | HFMD                           |
| S10862/SAR/98                             | AY125999                   | C1                 | C1        | HFMD                           |
| S11051/SAR/98                             | AY126000                   | C1                 | C1        | HFMD                           |
| S40221/SAR/00                             | AY126003                   | C1                 | C1        | HFMD                           |
| S18191/SAR/02                             | AY189153, AY189154 (VP1)   | C1                 | C1        | HFMD                           |
| 1M/AUS/12/00                              | AY126014                   | C1                 | C1        | HFMD                           |
| 5M/AUS/5/99                               | AY126009                   | C2                 | C2        | Meningitis                     |

CDC - Molecular Epidemiology of Human Enterovirus 71 Strains and Recent Outbreaks in the Asia-Pacific Region: Comparative Analysis of the VP1 and VP4 Genes

|                    |                          |    |    |                                  |
|--------------------|--------------------------|----|----|----------------------------------|
| 8M/AUS/6/99        | AY126012                 | C2 | C2 | Myelitis                         |
| 9F/AUS/6/99        | AY126013                 | C2 | C2 | Cerebellar ataxia                |
| 7F/AUS/6/99        | AY126010                 | C2 | C2 | Meningitis                       |
| 14F/AUS/9/99       | AY126011                 | C2 | C2 | Benign intracranial hypertension |
| KOR-EV71-01/KOR/00 | AY125966 (VP1), AF525220 | C3 | C3 | HFMD                             |
| KOR-EV71-03/KOR/00 | AY125968 (VP1), AF525221 | C3 | C3 | HFMD                             |
| KOR-EV71-06/KOR/00 | AY125970 (VP1), AF525222 | C3 | C3 | Aseptic meningitis               |
| KOR-EV71-10/KOR/00 | AY125974 (VP1), AF525223 | C3 | C3 | HFMD/Herpangina                  |
| KOR-EV71-13/KOR/00 | AY125976 (VP1), AF525224 | C3 | C3 | Paralysis                        |
| KOR-EV71-02/KOR/00 | AY125967 (VP1)           | C3 | -  | HFMD                             |
| KOR-EV71-05/KOR/00 | AY125969 (VP1)           | C3 | -  | Aseptic meningitis               |
| KOR-EV71-07/KOR/00 | AY125971 (VP1)           | C3 | -  | Aseptic meningitis               |
| KOR-EV71-08/KOR/00 | AY125972 (VP1)           | C3 | -  | Aseptic meningitis               |
| KOR-EV71-09/KOR/00 | AY125973 (VP1)           | C3 | -  | HFMD/Herpangina                  |
| KOR-EV71-11/KOR/00 | AY125975 (VP1)           | C3 | -  | HFMD/Herpangina                  |

<sup>a</sup>Place of origin is abbreviated as follows: AUS, Australia; KOR, Korea; SAR, Sarawak, Malaysian Borneo; SIN, Singapore; USA, United States of America.

<sup>b</sup>Unless otherwise indicated, accession number refers to a VP4 sequence.

<sup>c</sup>NA, not available; HFMD, hand, foot and mouth disease.
