# Supplementary material for: Molecular Epidemiology of Human Enterovirus 71 Strains and Recent Outbreaks in the Asia-Pacific Region: Comparative Analysis of the VP1 and VP4 Genes
Source: PubMed Central journal article supplement (PMC2957976; doi:10.3201/eid0904.020395), 2003-04
Supplement: 02-0395_appT2-s2.pdf [file 02-0395_appT2-s2.pdf]

**Appendix Table 2.** Human enterovirus 71 (HEV71) sequences obtained from GenBank

| Identity strain(origin <sup>a</sup> /yr) <sup>b</sup> | Accession no. | Gene(s) used in analysis |
|-------------------------------------------------------|---------------|--------------------------|
| CA16-G10(SAF/51)                                      | NC001612      | VP4                      |
| BrCr-CA-70(USA/70)                                    | U22521        | VP1 and VP4              |
| MS/7423/87(USA/87)                                    | U22522        | VP4                      |
| SHZH98(CHN/98)                                        | AF302996      | VP4                      |
| Nagoya(JPN/73)                                        | AB051301      | VP4                      |
| 258(BGR/75)                                           | AB051302      | VP1 and VP4              |
| Hungary(HGR/78)                                       | AB051303      | VP1 and VP4              |
| Yamanashi(JPN/78)                                     | AB051305      | VP4                      |
| Taiwan 80(TWN/80)                                     | AB051304      | VP4                      |
| V-14375(JPN/97)                                       | AB051319      | VP4                      |
| V-14389(JPN/97)                                       | AB051320      | VP4                      |
| V-14405(JPN/97)                                       | AB051321      | VP4                      |
| V-14433(JPN/97)                                       | AB051322      | VP4                      |
| V-14429(JPN/97)                                       | AB051323      | VP4                      |
| V-14570(JPN/97)                                       | AB051324      | VP4                      |
| V-14600(JPN/97)                                       | AB051325      | VP4                      |
| V-14653(JPN/97)                                       | AB051326      | VP4                      |
| V-14707(JPN/97)                                       | AB051327      | VP4                      |
| C7/Osaka(JPN/97)                                      | AB051328      | VP4                      |
| V-14457(JPN/97)                                       | AB051329      | VP4                      |
| SK-EV006(SAR/97)                                      | AB051331      | VP4                      |
| SK026(MAL/97)                                         | AB051332      | VP4                      |
| SK036(MAL/97)                                         | AB051333      | VP4                      |
| KED005(MAL/97)                                        | AB051334      | VP4                      |
| KED60(MAL/97)                                         | AB051335      | VP4                      |
| 1334(TWN/98)                                          | AB051306      | VP4                      |
| 1457(TWN/98)                                          | AB051307      | VP4                      |
| 1524(TWN/98)                                          | AB051308      | VP4                      |
| 981394(TWN/98)                                        | AB051309      | VP4                      |
| 981186(TWN/98)                                        | AB051310      | VP4                      |
| 981334(TWN/98)                                        | AB051311      | VP4                      |
| 981435(TWN/98)                                        | AB051312      | VP4                      |
| E1387(TWN/98)                                         | AB051313      | VP4                      |
| E1558(TWN/98)                                         | AB051314      | VP4                      |
| J1263P4(TWN/98)                                       | AB051315      | VP4                      |
| J1166P4(TWN/98)                                       | AB051316      | VP4                      |
| E1354(TWN/98)                                         | AB051317      | VP4                      |
| E1360(TWN/98)                                         | AB051318      | VP4                      |
| TW/2272/98(TWN/98)                                    | AF119795      | VP4                      |
| TW/2086/98(TWN/98)                                    | AF119796      | VP4                      |
| 240/86(TWN/86)                                        | AB037267      | VP4                      |
| 244/86(TWN/86)                                        | AB037268      | VP4                      |
| 5033/98(TWN/98)                                       | AB037250      | VP4                      |

CDC - Molecular Epidemiology of Human Enterovirus 71 Strains and Recent Outbreaks in the Asia-Pacific Region: Comparative Analysis of the VP1 and VP4 Genes

|                         |          |     |
|-------------------------|----------|-----|
| 5142/98(TWN/98)         | AB037251 | VP4 |
| H0106/98(TWN/98)        | AB037252 | VP4 |
| 1657/98(TWN/98)         | AB037253 | VP4 |
| 1658/98(TWN/98)         | AB037254 | VP4 |
| 1569/98(TWN/98)         | AB037255 | VP4 |
| 1499/98(TWN/98)         | AB037256 | VP4 |
| 480/98(TWN/98)          | AB037257 | VP4 |
| 874/98(TWN/98)          | AB037258 | VP4 |
| 737/98(TWN/98)          | AB037259 | VP4 |
| 607/98(TWN/98)          | AB037260 | VP4 |
| 602/98(TWN/98)          | AB037261 | VP4 |
| 588/98(TWN/98)          | AB037262 | VP4 |
| 1226/98(TWN/98)         | AB037263 | VP4 |
| 1288/98(TWN/98)         | AB037264 | VP4 |
| 693/98(TWN/98)          | AB037266 | VP4 |
| 5929/98(TWN/98)         | AB046739 | VP4 |
| 7008/98(TWN/98)         | AB046740 | VP4 |
| 1245a/98/tw(TWN/98)     | AF176044 | VP4 |
| Tainan/5746/98(TWN/98)  | AF304457 | VP4 |
| Tainan/4643/98(TWN/98)  | AF304458 | VP4 |
| Tainan/6092/98(TWN/98)  | AF304459 | VP4 |
| NCKU9822(TWN/98)        | AF136379 | VP4 |
| ZS6844/96(UK/96)        | AJ300756 | VP4 |
| JM8336/97(UK/97)        | AJ300761 | VP4 |
| JH17760/98(UK/98)       | AJ300760 | VP4 |
| MT17728/98(UK/98)       | AJ300764 | VP4 |
| LH7415/99(UK/99)        | AJ300753 | VP4 |
| JK815/99(UK/99)         | AJ300754 | VP4 |
| WM10620/99(UK/99)       | AJ300755 | VP4 |
| CS9410/99(UK/99)        | AJ300758 | VP4 |
| FW10756/99(UK/99)       | AJ300759 | VP4 |
| MC11418/99(UK/99)       | AJ300762 | VP4 |
| MC9178/99(UK/99)        | AJ300763 | VP4 |
| LT449/00(UK/00)         | AJ300757 | VP4 |
| 5865/sin/000009(SIN/00) | AF316321 | VP4 |
| 5666/sin/002209(SIN/00) | AF352027 | VP4 |
| S0309-TW-00(TWN/00)     | AY055176 | VP1 |
| M0267-TW-00(TWN/00)     | AY055184 | VP1 |
| M0225-TW-00(TWN/00)     | AY055190 | VP1 |
| N1034-TW-00(TWN/00)     | AY044181 | VP1 |
| N7008-TW-99(TWN/99)     | AY055201 | VP1 |
| N5101-TW-98(TWN/98)     | AY055174 | VP1 |
| N5202-TW-98(TWN/98)     | AY055200 | VP1 |
| N4643-TW-98(TWN/98)     | AY055194 | VP1 |
| H0139-TWN-98(TWN/98)    | AY055193 | VP1 |
| 7673-CT-87(USA/87)      | AF009535 | VP1 |
| MY104-9/SAR/97          | AF376072 | VP1 |
| MY821-3/SAR/97          | AF376077 | VP1 |

|                     |          |     |
|---------------------|----------|-----|
| 3799/SIN/98         | AF376117 | VP1 |
| 4F/AUS/4/99         | AF376105 | VP1 |
| SB2864/SAR/00       | AF376066 | VP1 |
| 5511/SIN/00         | AF376121 | VP1 |
| 2027/SIN/01         | AF376111 | VP1 |
| 4575/SIN/98         | AF376120 | VP1 |
| S10822/SAR/98       | AF376079 | VP1 |
| S11051/SAR/98       | AF376081 | VP1 |
| 1M/AUS/12/00        | AF376098 | VP1 |
| 14F/AUS/9/99        | AF376091 | VP1 |
| TW/2086/98(TWN/98)  | AF119796 | VP1 |
| CN04104/SAR/00      | AF376067 | VP1 |
| 26M/AUS/2/99        | AF376101 | VP1 |
| 18/Sin/97(SIN/97)   | AF251359 | VP1 |
| 4350/SIN/98         | AF376119 | VP1 |
| 2289-MAA-97(SAR/97) | AF135914 | VP1 |
| 2222-IA-88(USA/88)  | AF009540 | VP1 |
| 2258-CA-79(USA/79)  | AF135880 | VP1 |
| 2609-AUS-74(AUS/74) | AF135886 | VP1 |
| TW/1465/98(TWN/98)  | AF116814 | VP1 |
| 2641-AUS-95(AUS/95) | AF135947 | VP1 |
| 2286-TX-97(USA/97)  | AF135941 | VP1 |
| 27M/AUS/2/99        | AF376102 | VP1 |
| 6F/AUS/6/99         | AF376107 | VP1 |
| 2M/AUS/3/99         | AF376103 | VP1 |
| 7238-AK-87(USA/87)  | AF135952 | VP1 |
| 2623-AUS-86(AUS/86) | AF135945 | VP1 |
| 0756-MAA-97(MAL/97) | AF135935 | VP1 |

<sup>a</sup>Place of origin is abbreviated as follows: AUS, Australia; BGR, Bulgaria; CHN, China; HGR, Hungary; JPN, Japan; KOR, Korea; MAL, Peninsular Malaysia; SAF, South Africa; SAR, Sarawak, Malaysian Borneo; SIN, Singapore; TWN, Taiwan; U.K., United Kingdom; USA, United States of America.

<sup>b</sup>All sequences retrieved from GenBank are referred to by the strain name recorded in the GenBank record followed by place of origin and year of isolation in brackets. Strains sequenced during this collaborative project have been deposited with the information on origin and year already included in the strain name following the same nomenclature as in [Appendix Table 1](#).
